# Supplementary material for: Feeding-Related Knowledge, Attitudes, and Practices among Grandparents in Singapore
Source: MDPI journal article supplement (doi:10.3390/nu11071696), 2019-07-23
Supplement: s1 [file s1]

# QUESTIONNAIRE

---

## Project title:

Grandparents' Knowledge, Attitudes and Practices on the Feeding of Grandchildren in Singapore

Participant ID: \_\_\_\_-\_\_\_\_-\_\_\_\_

## Questions:

### **SECTION A: Screening questions**

1. Do you have a grandchild?
  - a. Yes
  - b. No
2. How old is your grandchild? \_\_\_\_ (rounded off to the nearest year) (Should be  $\leq 12$ )  
*Note: If you have more than 1 grandchild, please pick 1 grandchild that you think you spend the most time with.*
3. On average, how many days do you physically spend time with your grandchild per month (regardless of no. of hours per day)? \_\_\_\_ days per month (min:2; max: 31)
4. Select your nationality: (Has to be Singaporean/PR)
  - a. Singaporean/PR
  - b. Non-Singaporean/ Non-PR

### **SECTION B: Demographics**

1. What is your age? \_\_\_\_\_ (in years)
  2. Select your gender:
    - a. Male
    - b. Female
  3. Select your race:
    - a. Chinese
    - b. Malay
    - c. Indian
    - d. Others, please specify: \_\_\_\_\_
  4. Select your highest education level:
    - a. Primary school and below
    - b. Secondary school
    - c. Post-secondary (A level, diploma, ITE)
    - d. University degree and above
  5. Do you live with your grandchild?
-

- a. Yes
- b. No

6. Are you the primary caregiver for your grandchild (person who spends most time with the grandchild and performs most of the caregiving tasks)?

- a. Yes
- b. No

**GRANDPARENTS' FEEDING PRACTICES**

**SECTION C: Meal Condition**

*Please indicate the frequency for questions 1 and 2 only.*

|                         |                      |                   |                  |                                           |
|-------------------------|----------------------|-------------------|------------------|-------------------------------------------|
| <i>(a) All the time</i> | <i>(b) Sometimes</i> | <i>(c) Rarely</i> | <i>(d) Never</i> | <i>(e) Not applicable, please specify</i> |
|-------------------------|----------------------|-------------------|------------------|-------------------------------------------|

**A. Family**

1. When you are with your grandchild, how often do you get him/her to eat together with the rest of the family (regardless of the type of meal, including snacks and fruits)?

\_\_\_\_\_

**B. Entertainment**

2. How often do you allow your grandchild to use electronic devices (e.g. television / tablet / phone) during meals? \_\_\_\_\_

**C. Location (*you do not need to indicate frequency*)**

3. On average, you prepare home-cooked meals for your grandchild \_\_\_ times a week

4. On average, you obtain meals from outside (includes both eating out and takeaways) for your grandchild \_\_\_ times a week

**SECTION D: Direct Influence**

*Please indicate frequency for all the following questions:*

|                         |                      |                   |                  |                                           |
|-------------------------|----------------------|-------------------|------------------|-------------------------------------------|
| <i>(a) All the time</i> | <i>(b) Sometimes</i> | <i>(c) Rarely</i> | <i>(d) Never</i> | <i>(e) Not applicable, please specify</i> |
|-------------------------|----------------------|-------------------|------------------|-------------------------------------------|

1. How often are you involved in?:

- a. Planning what your grandchild has for meals/snacks \_\_\_\_\_
- b. Planning how much your grandchild has for meals/snacks \_\_\_\_\_
- c. Cooking for your grandchild's meals \_\_\_\_\_
- d. Presenting/preparing the food such that it is more interesting/appealing (e.g. cut ingredients into various shapes/small pieces) so that your grandchild will eat. \_\_\_\_\_
- e. Deciding when your grandchild has his/her meals \_\_\_\_\_
- f. Spoonfeeding your grandchild \_\_\_\_\_

Determining the type of food given

- 2. How often do you allow your grandchild to eat unhealthy food (e.g. sweets/soft drinks/ salty snacks/high fat foods/fast food)? \_\_\_\_\_
- 3. How often do you choose a wide variety of food (food from various food groups e.g. meat, fruits and vegetables, grains) for your grandchild to eat? \_\_\_\_\_

Determining the quantity of food given

- 4. How often do you allow your grandchild to decide how much food he/she eats? \_\_\_\_\_
- 5. How often do you set a minimum amount of food your grandchild eats during mealtimes? \_\_\_\_\_
- 6. How often do you set a maximum limit to the amount of food your grandchild eats during mealtimes? \_\_\_\_\_
- 7. How often do you set a maximum limit to the amount of unhealthy food (e.g. sweets/sodas/salty snacks/high fat foods/fast food) your grandchild eats? \_\_\_\_\_

**SECTION E: Indirect influence**

- 1. With regards to feeding your grandchild, you get your him/her to obey your instructions by: *(You may select more than one option)*
  - a. Telling him/her that he/she will get a reward
  - b. Warning him/her that he/she will get punished
  - c. Educating him/her about the positive or negative effects of eating a particular type/amount of food
  - d. Telling him/her their caregiver (other than yourself) said so.
  - e. Doing what you want him/her to do and telling him/her to do the same (being a role model to your grandchild)
  - f. You just let him do what he/she wants
  - g. Others (please specify):

---

---

---

---

**SECTION F: Factors that influence Feeding Practices**

- 1. How do you decide what to feed your grandchild? *(You may select more than one option):*
  - a. Your grandchild's preference
  - b. Your grandchild's usual appetite/ appetite at that point in time
  - c. What you feel is healthy for your grandchild

- d. What your grandchild's other caregiver(s) (e.g. parents, domestic helper) want your grandchild to eat
- e. How the meal is prepared (e.g. difficulty, time needed, ingredients you have left over at home)
- f. Cost of meal / ingredients
- g. Others (please specify):

---



---



---



---

**SECTION G: Feeding challenges**

1. Do you have difficulties feeding your grandchild due to any of the following reasons? (You may indicate more than one option)

- a. He/she says he/she is full
- b. He/she eats too much snacks between meal times and refuses his/her meals
- c. He/she does not like the type of food you give him/her (e.g. does not like meat, vegetables)
- d. He/she does not like the way you prepare the food (eg. too spicy, too little salt , too healthy as it is mostly steamed etc)
- e. He/she prefers to be fed by other caregivers (eg. parents, domestic helper etc)
- f. He/she is very playful and does not let you feed him/her (e.g. running around, watching television)
- g. You have conflicts with other caregivers regarding how to feed your grandchild
- h. You have difficulties in choosing healthier options for your grandchild
- i. You have no difficulties in doing so.
- j. Others (please specify):

---



---



---



---

**ATTITUDES**

**SECTION H: Attitudes**

Attitudes toward other caregiver's feeding practices

1. How do you feel about the other caregivers' feeding practices (Please only indicate 1 option for questions 1a and 1b)?

- a.

---

|                  |             |             |               |                    |
|------------------|-------------|-------------|---------------|--------------------|
| (a) Very healthy | (b) Healthy | (c) Neutral | (d) Unhealthy | (e) Very unhealthy |
|------------------|-------------|-------------|---------------|--------------------|

b.

|                 |            |             |             |                  |
|-----------------|------------|-------------|-------------|------------------|
| (a) Very strict | (b) Strict | (c) Neutral | (d) Lenient | (e) Very lenient |
|-----------------|------------|-------------|-------------|------------------|

Attitudes towards feeding role

2. You play an important role in feeding your grandchild (*Please only indicate 1 option*)

|                    |           |             |              |                       |
|--------------------|-----------|-------------|--------------|-----------------------|
| (a) Strongly agree | (b) Agree | (c) Neutral | (d) Disagree | (e) Strongly Disagree |
|--------------------|-----------|-------------|--------------|-----------------------|

**PERCEPTION AND KNOWLEDGE**

**SECTION I: Knowledge on Nutrition**

*Please indicate your opinion on each of the following statements:*

|          |           |
|----------|-----------|
| (a) True | (b) False |
|----------|-----------|

1. What your grandchild eats can affect his/her health. \_\_\_\_\_
2. The amount of fruit juices children drink is not a major concern as fruit juices are as healthy as fresh fruits. \_\_\_\_\_
3. If your grandchild does not like vegetables, he/she should take more fruits to compensate instead. \_\_\_\_\_
4. As long as your grandchild is growing well, it is okay to allow him/her to eat anything he/she wants. \_\_\_\_\_
5. It is okay for your grandchild to skip meals if he/she eats more for other meals. \_\_\_\_\_
6. It is important for your grandchild to finish all the food on his/her plate. \_\_\_\_\_
7. If your grandchild is overweight, he/she is likely to have health problems in the future. \_\_\_\_\_
8. If your grandchild is underweight, he/she is likely to have health problems in the future. \_\_\_\_\_

**SECTION J: Factors influencing views on feeding**

1. What influences your views on healthy eating for your grandchild? (*You may select more than one option*)

- a. Your parents/elders/follow tradition
- b. Your friends
- c. Your children
- d. Your grandchild
- e. Your doctor/nutritionist

- f. Personal experience
- g. Ministry of Health's promotion of health and nutrition (TV, Posters, Leaflets and Pamphlets in Polyclinics and Hospitals)
- h. Media (e.g. newspapers, books, TV, Internet, radio)
- i. Others (please specify):

---

---

---

---

2. Do you have difficulties learning about healthy eating and nutrition due to any of the following reasons? (*You may select more than one option*)

- a. The information is always changing and you cannot keep up.
- b. You cannot understand all the information available
- c. You do not have the interest to learn
- d. You do not have access to learning materials
- e. You feel overwhelmed by the amount of information available.
- f. You have difficulty discerning which information is true and which is false
- g. You have no difficulties in doing so.
- h. Others (please specify):

---

---

---
